# Supplementary material
Source: Springer Nature journal article supplement (https://www.springermedizin.de/resource/supplementary/12933_2009_219_MOESM4_ESM.pdf/9539878)

**A**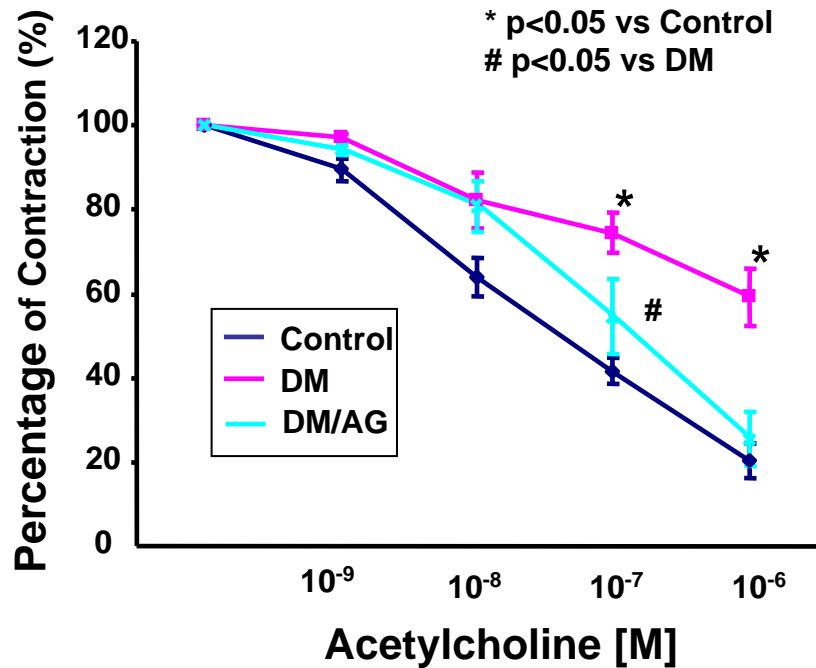**B**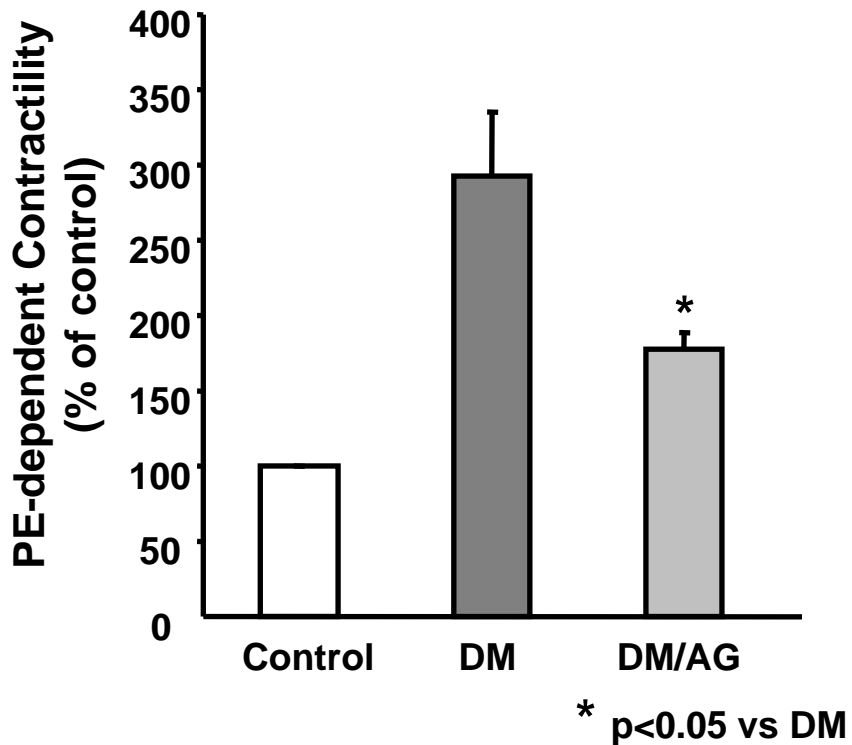

Supplement: MOESM4 [file 9539878]
